# Supplementary material for: Pyruvate carboxylase supports the pulmonary tropism of metastatic breast cancer
Source: PubMed Central journal article supplement (PMC6045837; doi:10.1186/s13058-018-1008-9), 2018-07-13

**A****TGF- $\beta$ 1**

4 days

**-****+**4T1  
scram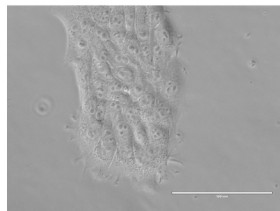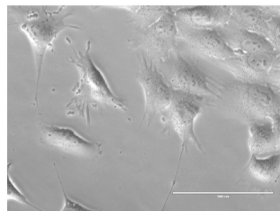4T1  
shPC  
25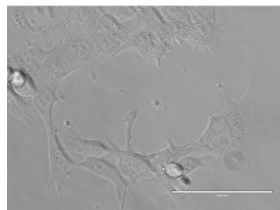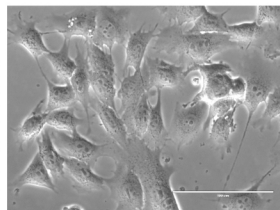4T1  
shPC  
28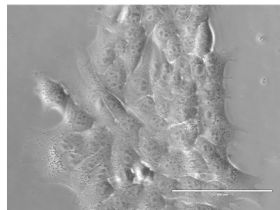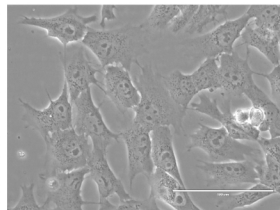**B**

4T1-scram

4T1-shPC 25

4T1-shPC 28

-

+

-

+

-

+

PC

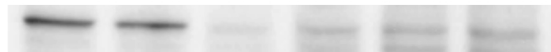 $\beta$ -tub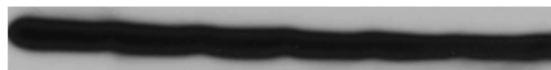**C**

Dox ng/ml

0

100

500

750

1000

Snail

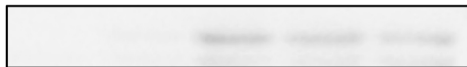

PC

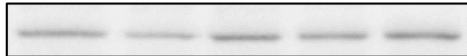 $\beta$ -Tub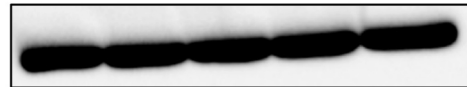

Supplement: 13058_2018_1008_MOESM3_ESM.pdf [file 13058_2018_1008_MOESM3_ESM.pdf]
