# Supplementary material for: Pyruvate carboxylase supports the pulmonary tropism of metastatic breast cancer
Source: PubMed Central journal article supplement (PMC6045837; doi:10.1186/s13058-018-1008-9), 2018-07-13

# 4T1

---

Primary tumor

Lung Metastasis

HIF1- $\alpha$

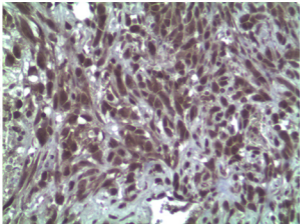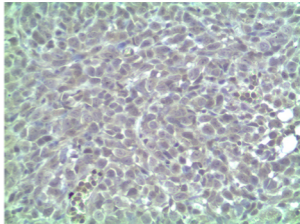

Supplement: 13058_2018_1008_MOESM5_ESM.pdf [file 13058_2018_1008_MOESM5_ESM.pdf]
